# Supplementary material
Source: PubMed Central journal article supplement (PMC2905070)
Supplement: mmc1.pdf [file mmc1.pdf]

Biophysical Journal, Volume 99

**Supporting Material**

**Embryonic Stem Cells Do Not Stiffen on Rigid Substrates**

Yeh-Chuin Poh, Farhan Chowdhury, Tetsuya Tanaka, and Ning Wang

## Supplementary Materials

### Embryonic Stem Cells Do Not Stiffen on Rigid Substrates

Yeh-Chiun Poh,<sup>\*&</sup> Farhan Chowdhury,<sup>\*&</sup> Tetsuya S. Tanaka,<sup>†</sup> Ning Wang<sup>\*§</sup>

<sup>\*</sup>Department of Mechanical Science and Engineering; <sup>†</sup>Department of Animal Sciences,  
University of Illinois at Urbana-Champaign, Urbana, IL 61801, USA.

<sup>&</sup>Contributed equally

<sup>§</sup>Corresponding author: [nwangrw@illinois.edu](mailto:nwangrw@illinois.edu)

## Supporting Figure

### Figure S1

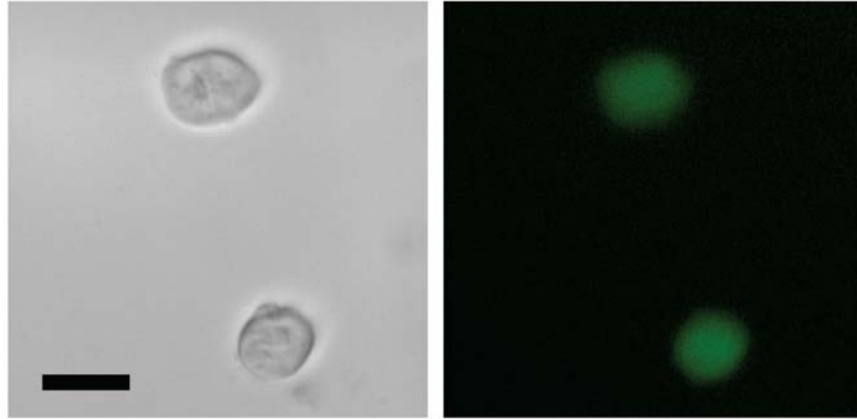

### Supporting Figure Legend

**Figure S1** Representative fluorescent image of Oct3/4 expression, a primary marker for pluripotency, in two mouse ESCs plated on collagen-1 coated 0.6 kPa substrate. Bright-field image (left) and corresponding green fluorescent protein (GFP) image (right) of *Oct3/4* expression from the same cells are shown. Expression of stably transfected GFP was driven by *Oct3/4* promoter in the presence of leukemia inhibitory factor (+LIF). The GFP *Oct3/4* expression is specific to the ESCs since it is inhibited by *Oct3/4* shRNA (1) and when these ESCs become differentiated after adding Retinoic Acid (1  $\mu$ M) and removing LIF (2). All stiffness and traction measurements were done on single undifferentiated, homogeneous, pluripotent ESCs (assessed by the uniformly high GFP *Oct3/4* intensity in each ESC with unique cell shape, colony-forming capability, and the short cell doubling time ( $\sim$ 10.5 hrs)) plated on collagen-1 (200  $\mu$ g/ml) coated polyacrylamide gels of varying stiffness. Scale bar = 10 $\mu$ m.

## REFERENCES and FOOTNOTES

1. Walker, E., M. Ohishi, R. E. Davey, W. Zhang, P. A. Cassar, T. S. Tanaka, S. D. Der, Q. Morris, T. R. Hughes, P. W. Zandstra, and W. L. Stanford. 2007. Prediction and testing of novel transcriptional networks regulating embryonic stem cell self-renewal and commitment. *Cell Stem Cell*. 1: 71-86.
2. Chowdhury, F., S. Na, D. Li, Y. C. Poh, T. S. Tanaka, F. Wang, and N. Wang. 2010. Material properties of the cell dictate stress-induced spreading and differentiation in embryonic stem cells. *Nat Mater*. 9: 82-8.
